# Supplementary material for: Demographics and physical and mental health of clients at a sports center with and without exercise addiction
Source: PeerJ. 2025 Mar 24;13:e19002. doi: 10.7717/peerj.19002 (PMC11949105; doi:10.7717/peerj.19002)
Supplement: Supplemental Information 1 [file peerj-13-19002-s001.xlsx]

## Sheet: Raw data
Age	Sex	Weight	Height	Religion	Income	Edu_level	Occupation	Marriage	Hist_physical	Hist_Mental	Cigarrate	Alcohol	Substance	Fq_exercise	Hours_exercise	Type_Run	Time_Run	Type_Swim	Time_Swim	Type_Cycling	Time_Cycling	Type_Wgt_train	Time_Wgt_train	Type_walk	Time_walk	Type_Bask	Time_Bask	Type_Bat	Time_Bat	Type_other	Time_other	Diet	Caloties	Food_gr	avoid_Sweet	DrinkWater	BurningCAl	EAI1	EAI2	EAI3	EAI4	EAI5	EAI6	KOOS_s1	KOOS_s2	KOOS_s3	KOOS_s4	KOOS_s5	KOOS_s6
26	1	55	167	1	20000	3	1	1	1	0	0	1	0	3	2	1	30	1	0	1	60	1	60	1	30	0		0		0		0	0	1	0	1	0	4	2	4	4	2	4	0	0	0	0	0	0
18	1	62	171	2	5000	1	1	1	0	0	0	1	0	3	2	1	45	0		0		1	0	1	0	0		0		0		0	0	0	0	0	0	3	1	4	2	1	3	0	0	0	0	0	0
19	1	78	178	1	10000	2	1	1	0	0	2	1	0	5	2	1	50	0		0		1	0	0		1	120	0		0		0	0	1	0	0	1	4	1	5	4	2	3	1	2	2	0	0	3
45	2	54	158	1	30000	1	4	3	0	0	0	1	2	7	1	1	30	0		1	30	1	60	1	30	0		1	60	0		1	1	1	1	1	1	5	5	5	5	5	1	0	0	0	0	0	0
47	2	61	160	1	40000	2	2	1	0	0	0	1	0	5	2	0		0		0		1	0	0		0		0		1	0	0	0	1	0	1	0	4	1	4	4	3	4	0	0	0	0	0	0
47	2	53	153	1	38220	2	2	2	0	0	0	1	0	5	2	0		0		0		0		0		0		0		1	0	0	0	1	0	0	0	4	1	5	1	5	1	0	0	0	0	0	0
48	2	61	158	1	60000	4	5	2	2	0	0	0	0	3	2	1	30	0		0		0		0		0		0		1	50	0	1	1	1	1	1	4	1	5	4	3	3	2	2	1	1	1	1
43	1	94	180	1	45000	3	5	2	0	0	0	0	0	5	1	0		0		0		0		0		0		1	50	0		0	0	1	0	0	1	4	3	4	4	4	4	2	3	0	0	0	0
27	1	58	175	1	30000	3	6	1	0	0	1	1	0	3	2	1	0	1	60	0		0		0		0		1	60	0		0	0	1	0	1	0	4	2	5	4	3	3	0	0	0	0	0	0
25	1	80	173	1	10000	2	1	1	0	0	0	3	0	4	2	1	180	1	90	0		0		0		0		0		0		0	0	1	0	0	1	4	1	5	5	4	3	0	0	0	1	1	0
22	2	83	165	1	10000	2	1	1	1	0	0	1	0	2	1	1	30	1	60	1	0	0		1	30	0		0		0		1	0	1	1	1	1	3	1	4	4	3	3	0	0	0	1	2	0
22	2	64	164	1	10000	2	1	1	0	0	0	0	0	1	2	1	15	1	30	1	20	0		1	15	0		1	45	0		0	0	1	1	1	1	3	2	4	3	3	4	0	2	0	0	0	0
20	2	58	160	1	12000	2	1	1	0	0	0	1	0	5	2	0		0		0		0		0		0		1	120	0		1	1	1	0	1	0	4	2	4	3	3	4	0	1	0	0	0	0
23	2	62	170	1	15000	2	1	1	1	0	0	1	0	5	2	0		0		0		0		0		0		1	120	0		0	0	1	0	0	0	3	1	4	3	3	4	0	0	0	0	0	0
18	1	65	168	3	0	1	1	1	0	0	0	0	0	2	2	0		0		1	0	0		1	0	0		1	30	0		0	0	1	0	0	0	3	1	4	4	1	4	0	2	0	1	0	0
19	2	70	168	1	17000	2	1	1	0	0	0	0	0	2	1	1	20	0		0		0		1	60	0		0		0		1	1	0	0	1	1	4	1	4	2	1	4	2	0	1	0	0	0
40	1	72	165	1	30000	4	7	4	1	0	0	1	0	3	2	1	30	0		0		1	30	0		0		0		0		1	0	1	0	0	1	4	1	4	4	5	5	0	0	0	0	0	0
20	2	68	165	0	9000	2	1	1	0	0	0	1	0	1	2	0		1	60	0		0		0		0		0		0		1	0	1	0	1	1	2	1	5	3	1	1	0	0	0	0	0	0
20	2	55	160	1	9000	1	1	1	0	0	0	0	0	1	2	1	30	1	60	0		0		1	60	0		0		0		0	0	1	0	0	1	3	1	4	4	2	2	0	3	2	0	0	0
47	1	71	175	1	100000	4	2	2	3	0	0	1	0	5	1	1	40	0		0		0		0		0		1	60	0		1	1	1	0	0	1	3	2	4	4	3	3	2	2	0	0	0	0
30	2	62	157	1	20000	4	1	1	0	1	0	3	0	6	2	1	60	0		0		1	60	0		0		0		1	120	0	0	1	0	1	1	5	1	5	5	3	5	0	1	0	0	0	0
19	1	64	174	1	10000	1	1	1	4	0	0	1	0	5	1	1	30	0		0		1	30	0		0		0		0		1	1	0	1	1	1	3	1	4	3	2	3	0	0	0	0	0	0
19	1	64	175	1	0	1	1	1	0	0	0	1	0	3	2	1	120	0		0		0		1	60	0		0		0		0	0	1	0	1	0	4	1	4	5	4	3	0	0	0	0	0	0
19	1	56	170	1	0	1	1	1	1	0	0	1	0	2	1	1	30	0		1	0	0		0		0		0		0		0	0	0	0	0	0	1	3	1	1	1	1	1	1	1	0	0	0
19	1	68	168	1	12000	1	1	1	0	0	1	1	2	1	1	1	30	0		0		0		0		0		0		0		0	0	0	0	1	0	3	1	4	3	1	3	0	1	2	1	0	2
52	2	60	158	1	100000	2	4	2	0	0	0	1	2	3	2	0		0		0		0		1	30	0		0		1	60	0	0	1	1	1	0	3	1	4	5	3	4	0	0	0	0	0	0
49	1	56	157	1	50000	1	4	2	5	0	0	0	0	5	2	0		0		0		0		1	53	0		0		1	60	0	1	1	1	1	1	5	4	5	5	4	4	0	2	0	1	1	1
25	2	90	167	1	20000	1	1	1	0	0	0	1	0	3	2	0		0		0		0		1	0	0		0		1	60	1	0	1	0	1	0	4	1	3	4	3	4	0	0	0	0	0	0
32	1	62	170	1	70000	3	8	1	0	0	0	3	0	5	2	1	30	1	45	0		1	90	0		0		0		1	120	1	0	1	1	1	1	5	1	4	4	3	2	0	0	0	0	0	0
21	2	61	164	1	10000	1	1	1	1	0	0	1	0	2	2	1	30	0		0		1	30	0		0		0		0		1	0	1	1	1	0	3	1	4	4	2	2	1	0	1	1	1	1
20	2	42	157	1	10000	2	1	1	0	0	2	1	0	1	1	1	30	1	0	0		0		0		0		0		0		1	0	1	1	1	1	4	1	3	4	4	4	0	2	1	3	3	1
39	1	64	170	1	0	3	1	1	0	0	0	1	0	3	2	1	15	1	30	0		1	60	0		1	120	1	120	0		1	1	1	1	1	0	5	1	5	3	2	5	1	3	1	0	0	0
33	2	50	156	0	0	4	2	2	0	0	0	1	0	1	1	0		0		0		0		0		0		0		1	0	0	0	1	0	0	0	1	1	4	2	3	1	0	0	0	0	0	0
18	2	53	178	1	7000	1	1	1	0	0	0	0	0	2	2	1	60	1	0	1	0	1	0	1	0	1	60	1	30	0		0	0	0	0	0	0	3	1	3	3	3	3	0	2	2	0	0	0
28	1	76	181	1	6000	2	1	1	0	0	0	1	0	2	1	1	30	0		0		0		0		1	30	0		0		0	0	1	0	0	1	2	1	1	1	1	1	2	3	0	0	0	0
31	1	114	178	1	6000	2	1	1	0	0	0	1	0	2	1	1	50	0		0		0		1	30	0		0		0		1	1	1	1	1	1	4	3	4	4	3	3	0	0	1	1	0	1
19	1	76	187	1	9000	1	1	1	1	0	0	3	0	5	2	1	30	0		0		1	60	0		0		1	180	0		0	1	1	0	1	0	3	2	3	4	2	3	1	2	1	0	0	0
21	2	55	167	1	15000	1	1	1	0	0	0	0	0	3	2	1	30	0		0		0		0		0		1	60	0		0	0	1	1	1	0	4	2	4	4	4	4	0	0	0	0	0	0
44	1	70	165	1	80000	3	4	1	0	0	0	3	0	4	2	0		1	0	0		1	0	1	0	0		1	0	1	0	1	0	1	0	1	1	3	1	5	4	2	4	0	2	2	0	0	0
21	1	56	168	1	10000	1	1	1	0	0	1	1	0	1	1	1	30	0		0		0		0		0		0		0		0	0	1	1	1	0	4	1	5	4	2	2	0	2	0	0	0	0
23	2	48	165	1	10000	1	1	1	0	0	0	1	0	1	1	0		0		0		0		1	0	0		1	0	0		0	0	1	1	1	0	3	2	3	2	2	2	0	1	0	0	0	0
23	1	70	165	0	8000	1	1	1	0	0	0	1	0	4	2	1	30	0		0		0		0		0		1	40	1	0	1	1	1	1	1	1	4	2	5	4	4	4	0	3	1	0	0	1
27	1	80	170	1	20000	2	3	1	0	0	0	1	0	3	2	1	30	0		0		0		0		0		1	160	1	60	0	0	1	0	0	0	3	3	2	2	2	2	1	1	1	2	2	1
56	1	69	168	1	50000	2	2	1	0	0	0	0	0	3	2	0		0		0		1	60	0		0		0		0		0	0	1	1	1	0	4	2	5	3	5	4	0	2	0	0	0	2
22	1	68	176	1	10000	1	1	1	0	0	0	1	0	2	2	0		0		0		0		0		1	180	0		0		0	0	1	0	1	0	3	3	4	3	2	3	2	2	1	0	1	1
21	1	68	173	2	20000	2	1	1	0	0	1	1	0	4	2	0		0		0		1	120	0		1	120	0		0		0	0	0	0	0	1	4	1	5	4	5	1	0	2	1	1	0	0
44	1	61	167	1	50000	3	9	2	1	0	0	1	0	3	2	1	40	1	60	0		0		0		0		0		0		1	0	1	1	1	1	3	3	3	4	3	3	0	0	0	0	0	0
18	2	49	155	1	0	1	1	1	0	0	0	0	0	3	2	1	40	0		0		0		0		0		0		1	0	0	0	1	0	1	1	4	3	4	3	2	2	0	1	1	3	3	1
18	1	62	176	1	0	2	1	1	0	0	0	1	0	2	2	1	0	0		0		0		0		1	0	0		0		0	0	1	0	1	0	4	4	5	4	5	5	0	0	0	0	0	0
19	1	71	170	1	0	1	1	1	0	0	0	0	0	3	2	0		0		0		1	0	0		1	0	0		0		0	0	0	0	0	0	4	1	4	4	3	4	1	3	2	0	0	1
39	2	60	168	1	50000	4	5	2	0	0	0	0	0	4	2	0		0		0		0		1	0	0		0		1	60	1	1	1	1	0	1	4	1	4	4	4	2	0	0	0	1	1	0
22	1	43	170	1	12000	2	1	1	0	0	0	1	0	1	2	1	20	0		0		1	90	1	0	0		0		0		1	1	1	1	1	1	3	1	4	5	4	4	0	2	1	1	2	0
32	2	43	165	1	25000	3	2	1	1	0	0	0	0	1	2	0		0		0		0		0		0		1	60	0		0	0	0	0	0	0	3	1	4	3	2	3	0	0	0	0	0	0
29	2	60	155	1	23000	3	5	1	0	0	0	0	0	5	2	0		0		0		1	0	0		0		0		0		1	1	1	1	1	1	5	1	4	5	4	2	0	2	0	1	1	0
45	1	110	170	1	40000	2	2	2	0	0	0	1	0	4	2	0		0		0		0		0		0		1	45	0		1	1	1	1	1	1	5	1	4	4	4	4	1	1	1	1	1	0
21	1	68	187	1	0	1	1	1	0	0	0	1	0	2	2	1	90	0		0		1	360	0		1	0	0		0		0	0	1	0	0	0	4	3	4	4	3	4	1	1	2	1	2	1
29	2	65	169	1	10000	3	1	1	1	2	0	3	0	3	1	1	0	1	0	0		0		1	0	0		0		0		1	1	0	1	1	1	3	2	4	2	1	2	0	0	0	0	0	1
29	2	64	158	1	15000	2	1	1	1	0	0	1	0	1	1	0		0		1	0	0		1	0	0		0		0		1	0	1	1	1	0	3	2	2	2	2	2	0	0	0	0	0	0
23	2	60	170	1	6000	1	1	1	0	0	0	1	2	5	2	1	30	0		0		0		1	0	0		0		0		0	0	1	1	1	0	4	2	4	4	3	4	0	0	0	0	0	0
19	1	65	173	1	3200	1	1	1	0	0	0	0	0	1	2	0		1	60	1	120	1	30	0		0		1	180	0		0	0	1	0	1	0	2	1	2	2	2	2	0	0	1	0	0	0
19	1	87	167	1	5200	1	1	1	0	0	0	0	0	5	1	1	50	0		1	0	0		1	0	0		0		0		0	0	0	0	1	0	4	1	5	4	4	4	0	0	0	3	3	1
28	2	65	158	1	20000	3	2	1	0	0	0	0	0	5	2	0		0		1	30	0		0		0		1	60	0		1	1	1	1	1	1	2	2	3	3	3	2	0	2	1	0	1	2
19	1	89	170	1	5000	1	1	1	0	0	0	1	0	2	2	0		0		0		1	0	0		0		0		0		1	0	1	1	1	0	3	2	3	3	2	2	1	1	0	0	0	1
25	2	61	162	1	6000	3	1	1	6	0	0	3	0	2	1	0		0		0		0		1	60	0		1	60	0		0	1	1	0	1	1	3	3	3	2	2	2	0	0	0	3	0	0
19	2	60	163	1	13000	2	1	1	0	0	0	1	0	3	2	1	30	0		0		0		0		1	0	1	120	0		0	0	1	0	1	1	5	1	4	4	2	4	1	1	1	0	0	0
21	1	75	173	1	13000	1	1	1	0	0	2	3	0	1	1	1	40	0		0		0		0		0		0		0		0	1	1	1	1	1	4	1	5	4	3	4	0	1	1	1	1	0
20	1	62	176	2	20000	2	1	1	0	0	0	1	0	2	2	1	20	0		1	15	1	30	0		0		0		0		0	0	1	1	1	0	3	1	4	3	3	3	0	0	0	0	0	0
21	1	77	177	1	15000	1	1	1	1	0	0	1	0	4	2	1	60	0		0		0		1	0	0		0		0		1	1	0	1	1	1	5	4	4	3	3	4	2	1	1	0	0	0
21	1	60	170	1	20000	1	1	1	0	0	0	1	0	2	1	1	90	0		0		0		0		0		0		0		0	0	1	0	1	0	4	2	4	4	3	3	0	0	0	0	0	0
21	1	61	174	1	10000	1	1	1	1	0	0	1	2	1	2	0		0		1	15	1	0	0		0		0		1	40	0	0	0	0	1	0	3	1	4	2	2	3	0	2	2	0	0	0
20	2	49	161	1	15000	1	1	1	0	0	0	1	0	3	1	1	0	0		0		0		0		0		0		0		0	0	1	0	1	0	3	1	2	4	2	4	0	1	0	0	0	0
21	2	41	162	1	12000	1	1	1	0	0	0	1	0	2	2	1	0	0		1	30	0		0		0		0		0		0	0	1	1	1	0	2	1	4	4	2	4	0	2	2	0	0	0
21	1	51	178	1	15000	2	1	1	0	0	2	2	0	1	2	1	45	0		0		0		0		0		0		1	0	0	0	0	0	0	0	2	1	2	2	1	2	0	0	0	1	1	0
21	2	54	164	1	10000	1	1	1	0	0	0	1	0	2	1	0	0	0		0		0		1	45	0		0		0		0	0	1	0	1	0	3	1	3	3	1	4	0	2	0	0	0	0
21	1	78	174	1	10000	1	1	1	1	0	0	1	0	1	1	0	0	0		0		0		1	30	0		0		0		0	0	0	0	1	1	3	1	3	2	1	4	0	0	0	0	0	0
29	1	85	180	1	27500	3	3	1	0	0	2	2	0	5	2	1	60	0		0		1	60	0		0		1	120	0		1	1	1	1	1	1	4	1	5	5	3	4	2	0	0	0	0	0
30	1	75	177	1	40000	2	3	1	0	0	0	1	0	7	2	0		0		0		0		0		0		0		1	180	1	1	1	0	0	1	4	1	5	4	5	1	0	0	0	0	0	0
21	1	57	167	1	12000	1	1	1	0	0	0	1	0	3	1	1	0	0		0		0		0		0		0		0		0	0	1	1	0	1	4	2	2	4	4	4	1	1	1	2	0	1
45	1	88	168	1	120000	2	3	1	0	0	2	1	0	5	2	0		0		1	45	0		0		0		0		0		0	0	1	0	1	1	5	1	4	3	4	4	0	0	0	0	0	0
36	1	75	179	1	70000	2	3	1	0	0	2	2	2	6	2	0		1	0	0		1	120	0		0		1	60	0		0	0	1	0	0	1	5	1	5	4	5	3	2	2	1	3	1	0
29	2	79	164	1	30000	2	3	1	0	0	0	0	0	5	2	1	90	0		1	0	1	0	0		0		1	0	1	0	1	1	1	1	1	1	3	1	4	3	1	5	0	3	0	0	0	0
29	2	68	167	3	20000	2	2	1	0	0	0	0	0	3	2	0		0		0		0		0		0		1	35	0		0	0	0	0	0	1	4	1	4	4	4	2	0	0	1	1	1	0
20	2	55	153	1	5000	1	1	1	1	0	0	1	0	3	2	0		0		0		0		0		0		1	60	1	60	0	0	1	1	1	1	3	1	3	4	3	2	0	3	2	0	0	1
19	2	45	159	1	12000	1	1	1	8	0	0	1	0	2	2	0		1	60	0		0		0		0		1	60	0		0	0	0	0	0	0	2	2	4	4	3	3	2	1	0	1	0	0
18	2	40	157	1	7500	1	1	1	0	0	0	1	0	1	2	0		0		0		0		1	120	0		1	0	0		0	0	1	0	0	0	3	1	4	3	1	1	0	0	0	0	0	0
19	2	57	160	1	0	2	1	1	0	0	0	1	0	3	1	1	30	0		1	30	0		1	30	0		1	90	1	90	0	0	1	0	0	0	4	1	3	2	2	2	0	2	1	0	0	0
19	2	46	162	0	15000	2	1	1	1	0	0	0	0	4	2	0		1	60	0		0		1	30	0		1	180	0		0	0	1	0	0	1	4	3	4	4	4	3	1	1	2	0	0	0
22	1	56	166	1	13000	1	1	1	0	0	0	1	0	4	2	0		0		1	60	1	30	0		0		0		1	240	0	0	1	0	1	1	4	2	5	4	5	4	0	3	0	0	0	0
21	1	93	182	1	10000	2	1	1	1	0	0	0	0	5	3	0		0		1	45	0		0		0		1	240	1	240	1	1	1	1	1	0	3	1	5	3	2	1	0	2	0	0	0	0
39	2	54	158	1	35000	3	2	1	1	0	0	0	0	1	1	0		0		0		0		1	30	0		0		1	0	0	0	1	1	1	0	3	2	2	4	3	4	0	0	0	1	0	0
23	2	43	153	1	0	2	2	1	0	0	0	1	0	2	2	1	60	0		0		0		0		0		0		0		1	1	1	1	1	1	3	1	5	4	2	3	0	2	0	0	0	0
23	2	69	175	1	15060	2	2	1	0	0	0	0	0	1	2	1	420	0		0		0		0		0		0		0		1	1	0	1	0	0	4	2	4	3	2	3	0	0	0	2	2	0
33	1	62	170	1	100000	2	4	2	0	0	2	1	0	3	2	1	30	0		0		1	60	0		0		0		0		1	1	1	1	1	0	2	3	4	4	2	3	1	1	0	0	0	0
27	1	68	178	1	30000	3	2	1	0	0	0	1	0	4	2	0		0		0		1	0	0		0		0		1	0	1	0	1	1	1	0	4	1	4	3	2	2	0	4	0	0	0	0
20	2	55	161	1	5000	2	1	1	0	0	0	0	0	3	2	1	30	0		0		1	40	1	0	0		0		0		1	1	0	1	1	1	4	1	5	5	3	4	2	0	0	0	0	0
29	1	65	170	1	20000	2	5	1	0	0	0	3	0	3	2	1	90	0		1	60	1	60	0		0		0		0		0	0	1	1	1	0	3	4	3	5	5	4	0	2	1	0	0	0
45	1	69	162	1	30000	3	2	2	1	0	0	1	0	3	1	1	60	0		0		0		0		0		0		0		0	0	1	0	1	1	5	1	5	4	5	5	0	1	0	0	0	0
19	2	45	156	1	5000	2	1	1	0	0	0	0	0	3	1	1	30	0		1	30	0		1	30	0		1	30	0		0	0	1	0	0	0	3	2	3	3	1	1	1	2	3	2	1	2
41	2	65	167	1	60000	4	2	2	0	0	0	0	0	1	1	0		0		0		0		1	0	0		0		0		0	0	1	0	0	0	3	1	4	4	3	2	0	1	0	1	1	0
19	1	64.5	175	1	12000	2	1	1	0	0	0	0	0	6	2	0		0		0		0		0		0		0		1	240	0	1	1	0	0	1	4	2	4	4	4	3	1	3	1	1	1	2
21	1	82	180	2	9000	1	1	1	0	0	1	1	0	4	3	1	15	0		0		1	20	1	30	0		0		1	240	1	1	1	1	1	1	5	1	5	4	3	5	0	0	0	0	0	0
21	1	67	175	1	20000	2	1	1	0	0	1	2	0	3	2	1	60	1	60	0		0		0		0		0		1	120	0	0	1	0	0	0	5	1	4	4	4	2	2	3	1	1	1	1
19	1	55	172	1	5000	1	1	1	0	0	0	1	0	5	2	1	0	0		0		0		0		0		0		0		1	1	1	1	1	1	4	2	5	2	2	3	0	0	0	0	0	0
20	1	55	172	2	15000	2	1	1	0	0	0	0	0	3	2	1	30	0		0		0		0		0		1	30	0		0	0	1	0	0	0	3	1	4	3	2	3	2	0	2	0	1	1
21	1	59	167	0	0	1	1	1	0	0	0	1	0	1	1	1	0	0		0		0		0		0		0		1	0	0	0	1	0	1	1	3	1	1	2	2	3	1	0	0	0	0	0
21	1	77	185	1	0	2	1	1	0	0	0	1	0	5	2	0		1	60	0		0		0		0		0		1	180	1	0	1	0	1	1	3	4	3	4	3	3	0	2	0	0	0	0
19	1	67	182	0	0	1	1	1	0	0	0	1	0	5	2	0		0		0		1	0	0		0		0		1	0	1	0	1	0	1	0	4	1	5	3	3	4	0	0	0	0	0	0
23	1	71	181	1	15000	2	1	1	0	0	0	1	0	6	2	1	15	0		0		1	0	1	15	0		0		1	180	0	0	1	0	1	0	4	1	4	4	4	4	0	0	0	0	0	0
22	1	55	173	1	0	1	1	1	0	0	0	1	0	7	2	1	30	0		0		0		0		0		1	60	0		0	0	0	0	0	0	3	2	3	2	3	2	1	1	1	1	1	0
20	1	53	175	1	8000	2	1	1	0	0	0	0	0	4	2	0		0		0		0		0		0		0		1	0	0	0	1	0	1	0	4	1	5	4	3	3	0	0	0	0	0	0
23	1	74	177	1	18000	2	3	1	0	0	0	1	0	6	2	1	60	0		0		1	60	1	120	0		0		0		1	1	1	1	1	1	5	1	5	5	5	5	0	0	0	1	1	0
33	2	48	149	1	41000	4	6	1	9	0	0	1	0	1	1	0		1	40	0		0		0		0		1	40	0		1	1	1	1	1	1	3	2	4	4	4	3	0	0	1	0	0	1
19	1	60	175	1	0	2	1	1	99	99	0	0	0	3	2	0		0		0		0		0		0		1	120	0		0	0	1	0	1	0	4	4	4	4	4	4	3	3	3	3	3	1
19	1	57	175	1	0	1	1	1	0	0	0	1	0	5	3	1	30	0		0		1	45	0		0		0		1	0	1	0	1	0	1	0	4	1	5	5	1	3	1	2	1	1	1	1
20	2	52.4	157	1	5000	2	1	1	1	0	0	0	0	3	3	0		0		0		0		0		0		0		1	300	0	0	1	0	1	1	4	2	5	4	4	4	2	2	2	1	2	1
19	1	65	184	1	8500	1	1	1	0	0	0	0	0	7	3	0		0		0		0		0		0		0		1	540	0	0	0	0	0	1	4	2	3	3	4	2	0	0	0	0	0	0
19	1	70	177	1	3000	1	1	1	0	0	0	1	0	3	3	1	0	0		0		0		1	0	0		1	0	1	180	1	1	1	0	1	1	4	4	5	4	3	4	0	1	0	0	0	0
24	1	73	175	3	20000	2	3	1	0	0	0	0	0	3	2	1	60	0		0		1	30	1	30	0		1	120	0		1	1	1	1	1	1	4	2	4	4	5	4	0	0	0	0	0	0
26	1	64	170	3	22000	2	4	1	0	99	2	3	0	4	2	1	30	0		0		0		0		0		1	120	0		1	1	1	0	1	1	4	3	4	4	3	4	2	2	3	2	3	2
18	1	62	177	1	8000	2	1	1	0	0	0	1	0	5	3	0		0		0		0		0		0		0		1	300	0	0	1	1	1	0	4	2	5	4	4	4	1	0	1	0	0	0
29	1	67	174	1	47000	4	2	1	0	0	0	0	0	1	2	0		0		0		0		0		0		1	0	0		0	0	1	0	1	0	3	3	2	2	1	3	1	1	1	0	1	1
27	1	76	171	1	0	3	1	1	0	0	0	1	0	1	2	0		0		0		0		0		1	0	1	0	0		0	0	0	0	0	0	3	1	4	4	2	3	0	0	0	0	0	0
27	1	51	170	0	10000	2	1	1	0	2	0	1	0	1	2	0		0		0		0		0		0		1	0	0		0	0	0	0	0	0	2	1	2	2	1	1	0	0	0	0	0	0
23	2	50	152	1	15060	2	2	1	10	0	0	0	0	3	2	1	30	0		0		0		1	30	0		0		0		1	1	1	1	1	1	3	1	2	4	3	4	0	1	0	0	0	0
22	2	59	165	1	15000	2	10	1	0	0	0	1	0	3	1	1	30	0		0		0		0		0		0		0		1	0	0	1	1	1	3	2	4	4	2	4	0	2	1	0	0	0
23	2	48	160	1	15060	2	2	1	0	0	0	0	0	1	1	0		0		0		0		0		0		0		1	15	0	0	1	1	1	1	2	1	2	4	1	1	0	2	2	1	0	1
23	2	46	156	1	28000	2	10	1	11	0	0	0	0	2	1	1	45	0		0		1	30	0		0		0		0		0	0	1	1	1	0	4	1	4	4	1	2	0	2	0	0	0	0
20	2	52	162	1	0	2	1	1	0	0	0	0	0	1	2	1	60	1	0	1	0	0		1	60	0		0		0		0	0	1	1	1	1	4	3	4	3	2	4	0	1	0	0	0	0
43	1	64	166	1	0	2	5	3	0	99	1	1	2	2	3	0		0		0		0		0		0		1	0	0		0	0	1	0	0	0	3	1	1	1	1	1	0	2	2	1	0	1
27	1	65	168	3	25050	2	2	1	0	0	0	0	0	3	2	1	30	0		0		1	15	0		0		1	60	0		1	0	1	0	0	1	5	2	4	5	4	4	2	3	2	0	0	1
42	1	82	165	1	20000	2	5	2	0	0	0	0	0	2	2	1	0	0		1	0	0		1	0	1	0	1	0	0		0	0	0	0	0	0	4	3	3	3	3	4	1	1	2	1	1	0
40	2	45	155	1	32000	3	4	2	0	0	0	0	0	1	1	0		1	15	0		0		0		0		0		0		1	0	1	1	1	1	3	1	4	3	3	2	0	1	1	0	0	0
28	1	110	188	1	20000	2	3	1	0	0	0	0	0	3	2	1	15	0		0		1	0	1	15	1	60	0		0		0	0	1	0	1	0	4	1	4	3	4	5	0	0	0	0	0	0
23	1	75	180	3	10000	2	1	1	0	0	0	0	0	5	2	1	30	0		0		0		1	15	0		1	60	0		0	0	1	0	0	0	5	2	5	4	5	5	0	0	0	0	0	1
21	1	82	192	1	10000	2	1	1	0	0	2	1	2	5	2	0		0		0		0		0		1	180	0		0		1	1	1	1	1	1	5	3	5	5	5	2	2	2	3	0	1	1
21	1	60	170	1	15000	2	1	1	0	0	2	1	0	6	3	0		0		0		1	120	0		1	120	0		1	120	1	1	1	0	0	1	5	4	5	5	5	5	1	2	2	0	0	0
20	1	71	174	1	10000	1	1	1	0	0	0	1	0	5	2	1	45	1	90	0		1	45	0		1	120	0		0		0	1	1	1	1	0	4	1	5	4	4	4	0	2	2	0	0	1
27	1	70	175	1	0	3	1	1	0	0	0	1	0	2	1	1	45	0		0		1	30	0		0		0		0		1	1	1	1	0	0	4	1	5	3	5	3	0	0	0	0	0	0
29	1	74	165	1	0	4	2	1	0	0	0	1	0	5	2	1	60	0		1	120	0		0		0		1	120	0		0	1	1	0	1	1	3	1	4	4	5	4	1	1	1	0	0	0
32	1	104	174	1	12000	2	5	1	0	0	2	1	0	2	1	0		0		0		0		1	0	0		0		0		1	0	0	1	1	0	3	2	4	4	1	2	3	3	2	0	2	1
54	2	67.8	156	1	20000	1	5	2	0	0	0	1	0	1	1	0		0		0		0		0		0		0		1	0	0	1	1	0	1	1	5	2	4	3	2	1	0	1	1	1	1	1
55	2		157	1	0	1	3	2	99	0	0	0	0	5	2	1	20	0		1	60	0		1	60	0		0		0		1	1	1	1	1	1	1	1	1	1	2	1	1	1	1	0	1	1
18	2	69	175	1	0	1	1	1	0	0	0	0	0	7	1	0		0		0		0		1	120	0		0		0		1	1	1	1	0	0	4	4	4	4	2	2	0	0	0	0	0	0
18	2	50	160	1	0	1	1	1	0	0	0	1	0	5	2	1	60	0		0		0		0		0		0		0		1	1	0	1	1	1	4	1	4	4	3	4	0	0	0	0	0	0
28	2	38	157	1	22000	1	2	1	0	0	0	1	0	1	1	1	40	0		0		0		0		0		0		0		0	0	1	0	0	0	3	1	4	4	2	2	0	0	0	0	0	0
41	1	67	168	1	80000	3	3	1	3	99	1	1	2	1	1	1	30	0		0		0		0		0		1	30	0		0	1	1	1	1	1	3	2	4	4	4	4	2	2	2	1	0	0
24	2	52		1	22000	2	3	1	0	0	0	1	0	4	1	1	30	1	20	1	0	1	30	0		0		0		0		1	1	1	1	1	1	3	1	4	4	4	4	0	0	0	2	0	0
30	2	80	165	1	38000	2	3	1	0	0	0	1	0	1	1	0		0		0		0		1	30	0		0		0		0	0	0	0	1	0	4	2	3	2	2	2	0	2	0	0	0	0
40	1	60	163	1	200000	2	4	2	0	0	1	2	0	5	2	1		1	0	1	0	1	0	0		0		1	0	0		0	1	1	1	1	1	5	5	5	5	5	5	2	3	3	2	2	1
40	1	67.5	168	1	85000	3	3	1	0	0	1	2	0	1	3	0		0		0		0		0		0		0		1	300	1	0	1	0	1	0	3	1	4	3	4	4	0	0	0	0	0	0
42	2	54	166	1	42000	3	3	1	0	0	0	1	0	4	2	1	30	0		0		0		0		0		1	0	0		0	0	1	1	1	0	3	2	4	4	1	3	0	1	0	0	0	0
41	1	63		1	75000	2	3	1	0	99	2	1	0	3	2	1	0	0		0		0		0		0		1	0	0		0	0	0	0	0	0	4	1	3	3	3	3	0	2	1	1	1	0
19	1	70	175	1	20000	1	1	1	0	0	0	0	0	4	2	0		0		0		1	100	1	30	0		0		0		0	1	1	1	1	0	2	1	5	3	4	4	0	0	0	0	0	0
23	1	75	180	1	20000	2	2	1	0	0	0	0	0	5	2	0		0		0		1	180	0		0		0		0		0	0	0	0	1	1	5	1	5	5	5	5	0	0	0	0	0	0
22	1	98	181	1	0	1	1	1	0	0	0	3	0	2	2	0		0		0		1	0	1	0	1	0	0		0		0	0	0	0	0	0	2	2	3	2	3	3	0	1	1	0	1	1
46	2	60	158	1	30000	2	3	2	0	0	0	0	0	1	1	0		0		0		0		1	0	0		0		0		1	1	0	0	0	0	3	4	3	2	2	2	0	0	0	0	0	0
43	1	78	170	1	0	2	4	2	0	0	0	0	0	1	1	0		0		1	0	0		0		0		0		0		0	0	1	1	1	0	3	3	3	2	2	3	0	1	1	0	0	0
22	2	58	165	1	9000	2	1	1	0	3	0	0	0	4	2	0		0		0		0		0		0		0		1	120	0	1	1	0	1	1	4	1	4	4	3	3	2	1	0	0	0	0
20	1	68	179	1	8000	2	1	1	0	0	0	1	0	4	2	0		0		0		0		0		0		0		1	180	0	1	1	0	1	1	4	1	4	5	4	5	0	3	1	0	0	2
20	1	63		1	0	1	1	1	0	0	0	0	0	3	2	1	30	0		0		1	60	0		0		0		0		0	0	0	0	0	0	4	1	5	5	4	3	0	2	0	0	0	0
20	2	70.9	169	1	8500	2	1	1	0	0	0	1	0	4	2	1	60	1	60	0		0		1	60	0		0		0		0	0	1	1	1	1	3	1	4	4	1	1	0	0	0	0	0	0
22	1	80	183	1	10000	2	1	1	0	0	0	1	0	5	2	0		0		0		0		0		1	0	0		0		0	0	1	0	1	1	4	2	3	4	1	4	0	1	0	0	0	0
22	2	85	167	1	18000	1	1	1	0	99	1	1	0	3	2	0		1	0	0		1	0	0		0		0		0		0	0	1	1	1	1	4	5	3	4	2	4	3	3	2	0	0	0
20	2	55		1	8000	1	1	1	1	0	0	1	0	1	2	0		0		0		0		0		0		1	0	1	0	0	0	0	0	0	0	3	2	3	4	2	3	0	0	0	1	1	0
19	1	69	180	1	4000	1	1	1	1	0	0	0	0	2	1	0		0		0		0		1	60	0		0		1	0	0	0	1	0	1	1	3	4	4	4	2	3	1	1	2	1	1	1
19	2	45		1	7000	1	1	1	0	0	0	1	0	1	1	0		0		0		0		1	20	0		0		1	120	0	0	1	0	0	0	4	2	2	2	3	2	0	2	0	0	0	1
24	1	83	173	2	5000	2	1	1	0	0	0	0	0	5	1	0		0		0		1	120	0		0		1	60	0		1	0	1	0	0	1	5	2	4	4	2	2	0	0	0	0	0	0
60	1	82	175	1	0	2	13	2	0	0	2	3	0	5	1	0		0		0		0		1	0	0		0		0		1	1	1	1	1	1	2	2	2	2	4	4	0	2	0	0	0	0
53	2	62	150	0	0	2	11	2	0	0	0	0	0	1	1	0		0		0		0		0		0		0		0		1	1	1	0	0	0	3	2	2	2	2	2	0	2	2	0	1	1
24	1			1	0	2	5	1	1	0	0	0	0	4	2	1	50	1	90	0		1	0	1	0	0		0		0		0	0	1	0	1	0	2	2	4	4	2	2	0	3	1	0	0	0
27	1	73		1	10000	3	1	1	0	0	0	0	0	3	2	1	50	0		0		1	40	0		0		0		0		1	1	1	0	1	1	4	3	4	4	3	3	0	0	0	0	0	0
23	1	77	169	1	8000	1	1	1	0	0	0	1	0	4	2	0		0		0		0		0		1	0	1	0	1	0	0	1	1	0	1	0	5	1	5	4	4	5	0	3	0	0	0	1
25	1	78	176	1	20000	2	1	1	0	0	0	1	0	6	2	1	40	1	60	0		1	120	1	60	0		1	180	0		0	1	1	1	1	1	5	1	4	3	3	3	0	0	0	0	0	1
45	1	82	173	3	40000	1	3	3	2	0	0	0	2	2	2	0		0		1	30	0		0		0		1	120	0		0	0	1	0	0	0	5	1	3	3	1	3	0	2	2	0	0	0
24	2	60	152	1	4000	2	1	1	0	0	0	0	0	1	1	1	30	0		0		0		0		0		0		0		0	0	0	0	0	0	3	1	3	3	2	3	0	0	2	0	0	0
23	1	65	169	1	20000	3	1	1	0	0	0	2	0	4	2	1	30	0		0		1	120	1	120	0		1	60	0		1	1	1	1	1	1	4	1	3	4	3	2	0	0	0	0	0	0
23	1	78	176	1	15000	2	1	1	1	0	0	1	0	5	2	1	40	0		0		1	60	1	30	0		0		0		1	1	1	1	1	1	2	2	2	3	2	2	0	0	0	0	0	0
18	2	54	156	3	15000	1	1	1	0	0	0	0	0	3	2	1	40	0		0		0		0		0		1	60	0		1	1	1	1	1	1	4	2	3	4	3	3	1	1	1	1	1	1
19	1	50	170	1	0	1	1	1	0	0	0	0	0	3	3	0		0		0		1	0	0		0		1	0	0		0	0	1	0	1	0	4	1	3	3	2	3	0	0	0	0	0	0
20	1	90.2	175	1	20000	1	1	1	0	0	0	3	0	3	2	0		0		0		1	0	1	30	1	0	1	120	0		0	0	1	0	0	1	4	1	5	5	4	4	2	1	1	0	0	0
19	1	76.4	175	1	9000	1	1	1	0	0	0	1	0	5	2	1	30	0		0		0		1	0	0		1	60	0		1	1	1	1	1	1	5	1	4	4	2	4	0	0	1	0	0	0
19	1	72	177	1	0	1	1	1	0	0	0	1	0	4	2	1	25	0		0		1	60	1	120	0		1	30	0		0	1	1	1	1	1	2	1	4	4	1	3	0	0	0	0	0	0
36	1	70	171	1	50000	1	3	1	0	0	2	1	0	1	3	0		0		0		0		0		0		0		1	0	0	0	0	1	1	1	5	1	3	4	3	3	1	3	3	1	1	2
23	2	48	155	1	13200	2	5	1	0	0	0	1	0	2	1	1	0	0		0		0		0		0		0		0		1	1	0	0	0	1	5	2	4	4	1	4	0	0	0	1	0	0
22	2	61	167	1	12600	2	5	1	0	0	0	0	0	3	2	0		0		0		0		0		0		0		1	0	1	1	1	0	0	1	5	3	3	4	2	4	2	3	0	0	0	0
19	2	49	158	1	4000	2	1	1	0	0	0	0	0	2	1	1	30	0		0		0		0		0		1	0	0		0	0	1	0	1	1	4	2	3	4	3	3	0	1	1	0	0	0
21	2	55	155	1	19000	1	1	1	0	0	0	1	0	2	2	0		0		0		0		0		0		1	120	0		0	0	0	0	1	0	3	2	4	4	2	3	2	3	3	0	0	0
21	1	70	172	1	8000	2	1	1	0	0	0	1	0	5	2	1	90	0		0		1	30	0		0		1	120	1	120	1	1	0	1	1	1	2	2	4	4	3	2	0	0	0	0	0	0
19	2	48	158	1	10000	1	1	1	0	0	0	1	0	3	2	1	60	1	30	0		0		0		0		1	0	0		1	1	1	1	1	0	5	1	5	3	4	3	0	0	0	0	0	0
22	2	60	174	1	15000	2	1	1	0	0	0	1	0	2	2	1	60	1	0	0		1	30	0		0		0		0		0	0	1	1	1	0	3	1	4	4	2	2	0	1	1	0	0	0
21	1	78	178	1	8000	1	1	1	0	0	0	1	0	3	3	0		0		0		0		0		1	0	0		0		0	0	0	0	0	0	3	1	4	4	3	3	2	2	2	1	1	0
19	1	82	164	0	5000	2	1	1	0	0	0	1	0	3	2	0		0		0		1	0	0		1	30	0		0		0	0	1	0	1	0	3	1	5	1	5	1	0	0	0	0	0	0
22	1	75	180	1	16000	2	1	1	0	0	0	2	0	6	2	1	40	0		1	30	1	30	0		0		0		0		0	0	1	0	0	1	5	1	5	4	4	4	1	0	0	0	0	0
21	1	64	168	1	10000	2	1	1	0	0	0	1	0	5	2	1	0	0		0		0		0		0		0		0		0	0	1	0	0	0	4	2	5	4	4	4	1	1	0	1	0	0
20	1	53	167	1	20000	2	1	1	0	0	2	1	0	7	2	1	50	0		1	50	1	50	0		0		0		0		0	1	1	1	1	1	5	5	2	4	4	3	0	0	0	0	0	0
35	1	68		1	38000	3	2	2	0	0	0	1	0	2	2	1	60	0		0		1	60	0		0		0		0		0	0	0	0	1	0	5	1	4	4	3	3	1	0	0	0	0	0
22	1	65	179	1	16000	2	1	1	0	0	0	1	0	3	2	1	60	0		0		0		0		0		0		0		0	0	1	0	0	0	4	1	3	4	3	3	2	1	2	1	1	0
19	2	40	155	1	0	1	1	1	0	0	0	0	0	6	2	1	60	1	60	0		0		0		0		0		0		0	1	1	1	1	0	5	1	4	4	5	4	0	0	0	1	0	0
22	1	66	173	1	5000	2	1	1	1	0	0	1	0	3	2	1	0	1	0	0		1	0	1	0	0		0		0		1	1	1	0	0	1	2	1	4	3	3	2	1	2	2	1	0	0
25	1	72	177	1	12000	3	1	1	0	0	0	1	0	6	2	1	30	0		0		1	60	0		0		0		1	120	1	0	1	0	1	0	4	1	4	4	3	2	0	1	0	0	0	0
22	1	70	177	1	12000	1	1	1	0	0	0	1	0	6	2	1	30	0		0		1	60	0		0		0		1	120	1	0	1	1	1	0	4	1	4	5	3	2	1	2	0	0	0	0
54	1	65	165	1	40000	2	2	2	1	0	0	1	0	5	2	1	30	0		1	90	0		0		0		0		0		0	0	1	0	1	0	5	1	4	4	4	4	0	0	0	0	0	0
28	1	73	170	2	0	1	1	2	0	0	1	2	2	2	2	1	30	0		0		0		0		0		0		1	0	0	0	0	0	0	0	3	3	3	3	3	3	0	0	0	0	0	0
23	1			1	4000	1	1	1	0	0	1	2	2	6	2	0		0		0		0		0		0		0		1	120	0	0	0	0	0	1	5	3	3	4	3	5	3	2	1	1	2	1
19	1	72	167	1	16000	1	12	1	0	0	2	3	0	3	1	1	540	0		0		0		0		0		0		0		0	1	0	1	1	0	2	1	5	3	2	2	0	0	0	0	0	0
19	2	76	170	1	8000	1	1	1	0	0	0	0	0	3	2	1	30	0		0		1	30	0		0		0		0		0	0	1	0	1	1	4	2	4	4	4	4	0	0	0	0	0	0
19	2	62	163	1	10000	2	1	1	0	0	0	1	0	4	2	1	40	0		0		1	30	1	30	0		0		0		0	0	1	0	1	0	3	1	3	3	3	2	0	2	1	0	1	0
18	2	97	172	1	12000	2	1	1	0	0	0	1	0	3	2	1	60	0		0		0		0		0		0		0		1	1	1	1	1	1	4	4	4	3	4	4	0	1	0	0	0	0
20	1	67	189	1	7000	1	1	1	0	0	2	1	0	4	2	1	30	0		0		0		0		0		0		1	0	0	0	1	0	1	1	5	2	4	4	2	3	2	2	2	0	1	2
18	2	50	165	1	10000	1	1	1	0	0	1	1	0	4	2	0		0		0		0		0		1	0	0		0		0	0	1	0	0	0	4	1	4	3	3	4	0	0	0	0	0	0
19	1	80	186	1	0	1	1	1	0	0	0	1	0	3	2	0		0		0		0		0		1	0	0		0		0	0	0	0	0	0	4	1	3	1	3	3	1	2	2	2	2	2
32	2	47	158	1	21000	4	2	1	0	0	0	1	0	1	2	1	30	0		0		0		0		0		1	120	0		0	1	1	1	1	1	3	1	3	4	3	3	1	2	2	1	1	1
21	1	78	177	1	10000	1	1	1	0	0	0	1	0	5	2	0		0		0		0		0		1	180	0		0		1	1	1	0	0	1	5	1	5	4	5	4	0	0	0	0	0	1
27	2	70	161	1	0	2	12	1	0	0	0	0	0	3	3	1	30	1	60	0		1	0	0		1	180	0		0		0	1	1	1	1	1	2	2	4	4	3	3	0	1	2	1	1	1
18	2	56	167	1	0	1	1	1	0	0	0	0	0	5	2	1	20	0		0		0		1	20	1	30	1	40	1	0	0	0	1	0	1	1	4	1	5	4	1	4	0	0	0	0	0	0
20	2	50	170	1	5000	1	1	1	0	0	0	1	0	6	3	1	30	0		0		0		0		1	30	0		0		0	0	1	0	1	1	3	2	3	4	1	3	1	2	1	1	0	1
22	2	56	166	1	10000	2	1	1	0	0	1	1	0	3	2	0		1	60	0		0		0		0		0		0		0	0	1	0	1	1	4	1	5	3	3	4	2	2	1	0	0	0
19	1	78	174	1	10000	2	1	1	0	0	2	1	0	4	2	0		0		0		1	180	0		0		0		0		0	0	1	0	0	0	5	2	5	5	5	4	0	0	0	0	0	0
40	2	45		1	50000	4	5	1	0	0	0	3	0	3	2	1	60	0		0		1	30	0		0		1	120	0		1	0	1	0	0	0	4	1	3	4	3	2	0	0	0	0	0	0
19	1	73	173	1	6000	1	1	1	0	0	0	1	0	5	2	1	0	0		0		0		0		0		0		0		0	0	1	0	0	0	4	1	5	4	3	2	0	0	1	0	0	1
20	1	57	166	3	0	1	1	1	0	0	0	0	0	3	2	1	40	0		0		0		0		0		0		0		0	0	1	0	1	1	5	2	4	5	3	4	2	2	2	2	1	2
21	2	57	164	1	10000	1	1	1	0	0	0	1	0	4	3	1	180	0		0		0		0		0		0		0		1	0	1	0	0	1	4	1	4	4	3	4	1	1	0	0	1	0
19	2	53	160	1	5000	1	1	1	0	0	0	1	0	3	2	1	30	1	30	1	30	0		0		0		0		0		0	0	1	0	1	0	5	3	5	5	5	5	0	3	0	0	0	0
20	1	74	179	1	0	1	1	1	0	0	0	1	0	7	2	1	0	0		0		0		0		0		0		0		1	0	1	1	1	0	4	1	5	5	4	3	0	0	0	0	0	0
22	1	65	172	1	8000	1	1	1	0	0	0	1	0	5	2	0		0		0		0		0		0		0		1	20	1	1	1	1	1	1	3	3	3	3	3	3	0	0	0	0	0	0
20	2	73	177	1	0	2	1	1	0	0	0	0	0	5	1	1	45	0		1	10	1	40	0		0		0		1	0	1	1	1	1	1	1	5	1	5	5	1	1	0	0	0	0	0	0
58	2	61	157	1	40000	3	5	1	1	0	0	0	0	3	1	1	45	0		0		0		1	40	0		0		0		0	0	0	0	1	0	3	2	4	4	3	3	0	1	1	0	0	0
20	2	48	160	1	0	2	1	1	11	0	0	1	0	3	2	1	30	0		1	0	0		1	30	0		0		0		0	0	0	0	1	1	4	2	4	3	2	4	0	0	0	0	0	0
19	2	85	166	1	7000	2	1	1	1	0	0	1	0	4	2	1	50	0		0		0		0		0		0		1	60	1	1	1	1	1	0	3	4	4	2	2	2	1	3	1	1	3	0
19	2	45	152	1	0	2	1	1	12	0	0	1	0	3	1	1	0	0		1	0	0		0		0		0		0		0	0	1	0	0	0	4	1	4	3	2	4	0	0	0	0	0	0
21	2	52	166	1	24000	2	1	1	0	0	0	1	0	3	1	1	0	0		0		0		1	0	0		1	0	1	40	0	0	1	0	1	0	3	2	4	4	1	3	0	0	0	0	0	0
22	1	65	170	1	5000	1	1	1	0	0	1	1	0	4	2	1	60	0		1	180	1	60	1	60	0		0		0		0	0	1	1	1	1	4	3	3	4	3	4	2	3	1	2	3	2
22	1	56	160	1	5000	1	1	3	0	0	1	1	2	2	2	1	30	0		0		0		0		0		0		0		0	0	0	0	0	1	4	2	5	3	3	3	0	2	2	1	0	1
19	1	78	178	1	12000	2	1	1	0	0	2	1	0	7	2	1	90	0		0		1	0	0		1	120	0		0		0	0	0	0	0	1	5	2	5	5	1	3	1	2	2	1	0	1
19	1	62	170	0	12000	1	1	1	1	0	0	1	0	5	2	0		0		0		1	120	0		0		0		0		1	1	1	1	1	1	4	1	5	4	2	4	0	0	0	1	1	1
22	2	68	173	1	10000	2	1	1	0	0	0	1	0	2	2	0		0		0		1	60	0		0		0		0		0	0	0	0	0	0	4	2	3	3	3	3	2	2	0	0	1	0
22	2	58	175	1	12000	2	1	1	0	0	2	1	0	5	2	0		0		0		0		0		1	60	0		0		0	0	1	0	0	0	3	2	3	4	2	3	0	0	0	0	0	0
19	2	58	160	3	10000	1	1	1	13	0	0	1	0	5	2	1	60	0		0		1	0	0		0		0		0		1	1	1	1	1	1	4	2	4	4	3	2	0	0	0	0	0	0
47	2	61	148	1	8500	1	12	2	14	0	0	0	0	1	1	0		0		0		0		1	30	0		0		0		0	0	1	1	1	1	5	2	5	5	5	5	0	2	2	1	2	1
20	2	67	165	1	8000	1	1	1	0	0	0	1	0	3	1	1	30	0		0		0		0		0		0		0		1	0	1	1	1	1	3	2	2	4	4	1	0	1	0	0	0	0
25	1	103	175	1	5000	1	1	1	0	0	1	3	0	5	1	1	60	0		0		0		1	60	0		0		0		0	0	1	0	0	0	4	4	3	4	3	3	0	2	2	1	2	1
22	1	63	163	1	0	1	1	1	0	0	2	0	0	3	2	1	0	1	0	0		1	0	1	0	0		0		0		0	1	1	1	1	0	4	1	2	4	2	3	0	0	0	0	0	0
25	2	50	163	1	10000	2	1	1	0	0	0	1	0	3	2	1	30	0		0		0		0		0		0		1	60	0	0	0	1	1	1	3	1	4	3	2	3	2	2	2	0	0	1
22	1	63	185	1	6000	1	1	1	0	0	1	1	0	5	2	1	30	0		0		1	130	1	60	0		0		0		0	0	0	0	1	1	4	3	5	5	3	4	0	2	1	0	0	1
43	2	86	155	1	15000	1	4	1	12	0	1	1	2	2	1	0		0		0		0		1	60	0		0		0		0	1	1	1	1	1	3	4	3	2	3	4	3	3	3	3	3	2
19	2	53	167	0	4000	2	1	1	1	0	0	0	0	2	1	1	45	0		0		0		0		0		0		0		0	0	1	1	1	1	2	3	4	2	2	3	0	0	0	0	0	0
19	2	51	157	1	0	2	1	1	0	0	0	0	0	1	1	0		0		0		0		0		0		0		1	0	0	0	0	1	1	0	2	1	1	1	1	1	0	0	0	0	0	0
23	2	53	158	1	15000	2	1	1	0	0	0	1	0	6	3	1	30	1	25	1	10	1	90	1	5	0		0		1	300	1	1	1	1	1	1	3	1	5	5	5	5	0	2	2	0	0	2
19	1	60	176	1	0	1	1	1	0	0	0	0	0	2	2	1	60	0		0		0		0		0		1	60	0		0	0	0	0	0	0	4	1	4	3	2	2	0	0	0	0	0	0
19	1	65	168	1	0	1	1	1	1	1	2	1	0	4	2	0		0		0		0		1	0	0		0		0		1	1	0	1	1	1	3	3	3	3	3	3	0	0	0	0	0	0
18	1	75	180	1	5000	1	1	1	0	0	0	1	0	5	2	0		0		0		0		0		1	180	0		0		0	0	1	0	1	0	4	3	5	4	3	4	0	0	0	1	1	0
20	1	84	183	1	8000	1	1	1	0	0	0	1	0	6	2	1	30	0		0		1	60	1	0	1	180	0		0		1	1	1	1	1	1	5	1	4	5	4	4	0	2	0	0	0	0
18	1	65		0	8000	1	1	1	0	0	2	1	0	4	2	0		0		0		1	30	0		1	180	0		0		0	0	1	0	0	0	4	2	4	4	3	2	0	0	0	0	0	0
21	1	55	170	1	15000	1	1	1	0	0	0	1	0	3	2	1	50	0		0		1	0	1	10	0		0		0		0	0	1	0	1	1	4	1	4	4	2	3	0	0	0	0	0	0
19	1	75	176	1	6000	2	1	1	0	0	0	0	0	3	1	1	0	0		0		0		0		0		0		0		1	1	1	1	1	1	4	4	4	4	2	4	0	0	0	0	0	0
20	2	54	165	1	15000	2	1	1	0	0	0	0	0	3	2	1	20	0		0		0		1	0	0		1	0	0		1	1	0	0	1	1	4	2	4	4	4	3	0	1	0	0	0	0
22	1	67	175	1	20000	1	1	1	0	0	1	1	0	4	2	0		0		0		1	60	0		0		0		0		0	0	1	1	1	1	4	2	4	4	1	3	0	1	0	0	0	0
31	1	65	175	1	37000	2	3	1	0	0	0	0	0	2	2	1	0	1	0	0		1	0	0		0		0		0		0	1	1	0	1	1	2	1	5	2	2	4	0	0	0	0	0	0
35	2	48	156	1	0	4	5	1	1	0	0	0	0	1	1	0		0		0		0		0		0		1	0	1	0	1	0	1	1	0	0	3	1	4	2	3	2	0	0	0	0	0	0
31	2	61		1	10000	1	11	1	0	0	0	1	0	4	1	0		0		0		0		1	40	0		0		0		0	0	1	0	0	1	4	2	2	1	2	2	0	0	0	0	0	0
34	2	55	150	1	10000	1	5	1	0	0	0	3	0	5	1	0		0		0		0		1	40	0		0		0		0	0	1	1	1	1	3	2	2	1	2	2	0	0	0	0	0	0
40	2	63	168	1	50000	3	4	2	0	0	0	1	0	5	2	0		0		0		0		0		0		1	180	0		0	0	1	0	0	0	3	1	3	3	3	2	2	0	0	0	0	0
47	1	65	168	1	100000	3	3	2	0	0	0	0	0	5	2	1	60	0		0		0		0		0		1	180	0		0	0	1	0	1	0	3	3	3	3	3	3	0	0	0	0	0	0
52	2	48	159	1	50000	2	4	2	0	0	0	0	0	5	2	0		0		0		0		0		0		1	180	0		0	1	1	1	0	0	3	3	3	3	3	3	0	0	0	0	0	0
53	2	58	151	1	200000	2	4	1	0	0	0	1	0	3	2	0		0		0		0		0		0		1	180	0		1	1	1	1	1	1	4	4	2	4	4	4	0	0	0	0	0	0
20	2	48	153	1	4000	1	1	1	0	0	0	0	0	3	1	1	20	0		0		1	40	0		0		0		0		0	0	1	0	1	1	3	1	1	2	2	3	0	0	0	0	0	0
19	2	70	167	1	12000	1	1	1	1	0	0	1	0	1	1	0		0		0		0		0		0		0		1	0	0	0	1	0	0	0	3	1	4	3	4	4	0	0	0	0	0	0
22	1	67	175	1	10000	1	1	1	0	0	0	1	0	6	2	0		0		0		0		0		0		0		1	0	0	1	1	0	0	1	3	2	4	3	4	3	1	0	1	0	0	1
19	2	55	148	1	5000	1	1	1	0	0	0	0	0	2	2	0		0		0		0		0		0		1	30	0		0	0	1	1	1	1	2	2	5	4	2	3	1	0	0	2	2	0
18	1	62.5	168	1	0	1	1	1	0	0	0	1	0	3	2	1	30	1	60	0		0		1	30	1	30	1	40	0		0	0	0	0	1	0	3	1	4	3	4	3	2	3	0	3	0	0
20	1	65.5	168	1	0	1	1	1	0	0	0	0	0	3	2	1	30	0		1	30	0		1	30	0		1	30	0		0	0	0	1	1	1	3	1	4	4	2	2	3	1	3	1	1	3
19	1	54	173	1	0	1	1	1	0	0	0	0	0	2	2	1	20	0		0		0		1	10	0		1	120	0		0	0	0	0	0	0	3	3	5	5	1	4	0	0	0	2	2	0
19	1	50	169	1	0	1	1	1	0	0	0	1	0	2	2	1	15	0		1	15	0		1	15	0		1	60	0		0	0	1	0	0	0	3	1	4	3	1	2	0	0	0	1	1	0
21	1	65	175	0	10000	1	1	1	0	0	2	1	0	3	2	1	90	0		0		1	120	1	120	1	180	0		1	120	0	0	1	1	0	0	5	3	4	4	4	3	0	3	0	0	0	1
21	1	63	182	1	20000	2	1	1	0	0	2	1	0	3	2	1	60	0		0		1	30	1	10	1	180	0		0		0	0	1	1	1	0	5	1	4	4	1	2	0	0	0	0	0	0
49	2	66.5	145	1	38000	2	2	1	0	0	0	0	0	3	2	0		0		0		0		0		0		1	0	0		0	1	1	1	1	0	4	2	2	2	2	2	0	0	0	0	0	0
60	2	50	145	1	29000	2	12	2	15	0	0	0	0	3	2	1	30	0		0		0		0		0		1	0	0		0	1	1	1	1	1	4	4	4	4	4	4	0	1	1	2	1	1
53	2	58	150	1	0	2	3	1	0	0	0	1	0	6	2	0		0		0		0		0		0		1	120	0		1	1	1	1	1	1	4	3	4	4	4	4	1	2	0	0	0	0
59	1	73	170	1	80000	2	2	2	0	0	0	1	0	3	2	1		0		1	30	0		1	12	0		1	60	0		0	0	1	0	1	1	4	4	4	4	2	3	2	2	1	0	0	0
25	1	86	172	0	21000	2	1	1	0	0	0	1	0	1	2	0		0		0		0		0		0		1	0	0		0	1	0	1	1	0	2	4	2	2	4	4	0	0	0	0	0	0
41	1	130	178	1	0	2	3	1	15	0	0	1	0	3	2	0		0		1	30	0		0		0		1	30	0		1	1	1	1	1	1	3	2	4	4	4	3	3	2	2	0	1	1
21	2	50	159	1	7000	2	1	1	0	0	0	1	0	4	2	1	60	0		0		1	0	0		0		0		0		1	1	0	1	1	1	5	1	4	4	3	4	0	0	0	0	0	0
21	1	73	183	1	6000	1	1	1	0	0	1	0	2	2	1	1	45	0		0		1	60	0		1	180	0		0		1	0	1	0	1	0	4	3	5	4	4	4	0	0	0	0	0	1
18	2	45	172	1	0	1	1	1	0	0	0	0	0	3	1	0		0		0		0		1	0	0		0		1	40	0	0	1	0	1	0	4	2	3	4	4	2	1	1	1	0	0	0
38	2	68	158	1	12000	1	2	2	0	0	0	1	0	2	1	0		0		0		0		1	20	0		0		0		1	1	1	0	0	1	3	3	4	2	2	3	2	2	2	2	1	1
18	2	38	156	1	0	1	1	1	0	0	0	0	0	2	2	1	30	0		1	30	0		0		1	120	0		1	180	0	0	1	0	0	0	3	1	1	1	1	1	0	1	1	1	0	0
18	2	51	164	1	0	1	1	1	1	0	0	0	0	4	2	1	60	0		1	30	0		0		0		0		1	120	1	0	1	0	1	0	3	2	4	5	1	3	0	0	0	0	0	0
18	2	61	165	0	0	1	1	1	1	0	0	0	0	7	2	1	15	0		1	30	0		1	30	1	180	0		1	30	1	0	1	0	1	0	4	1	3	4	3	3	0	0	1	0	0	0
18	1	73	168	1	0	1	1	1	0	0	0	0	0	3	2	0		1	60	0		0		0		0		1	120	1	120	1	1	1	1	1	1	5	4	5	3	2	4	1	2	0	0	0	0
22	1	103	179	1	0	2	1	1	0	0	0	3	0	5	2	1	0	0		0		1	0	0		1	0	0		0		1	0	1	1	1	0	5	1	5	3	4	3	0	0	0	0	0	0
49	2	87	161	1	9000	1	12	1	15	99	0	1	0	4	2	0		0		0		0		1	0	0		0		0		0	0	1	1	1	1	4	2	4	3	2	2	0	0	0	0	0	0
27	2	66	160	1	9000	1	12	2	0	0	0	0	0	2	1	1	15	0		0		0		0		0		0		0		1	0	1	1	1	1	4	2	4	4	2	4	0	0	0	4	3	0
19	1	60	175	1	0	1	1	1	0	0	1	1	0	4	2	0		0		0		0		0		1	180	0		0		0	0	1	0	0	0	3	2	3	3	3	3	2	2	2	0	0	0
18	2	58	156	1	0	2	1	1	0	0	0	0	0	3	2	0		0		0		0		1	0	1	180	0		0		0	0	1	0	1	0	4	3	2	4	2	4	0	1	1	0	0	0
22	2	55	165	2	10000	1	1	1	0	0	0	0	0	7	2	0		0		0		0		0		1	40	0		0		1	1	1	0	1	1	5	1	1	5	1	1	2	2	2	2	2	1
26	1	77	184	2	0	1	1	1	1	0	0	0	0	3	2	0		0		0		1	0	0		1	0	0		0		0	0	1	1	1	0	5	1	1	5	1	1	0	0	2	0	3	0
42	2	60	153	1	15000	1	1	1	0	0	0	0	0	3	2	1	60	0		0		0		1	120	0		0		0		1	1	1	1	1	1	4	4	5	4	4	4	3	3	2	3	3	2
24	1	75	190	1	15000	1	1	1	0	0	1	1	0	5	2	0		0		0		1	45	0		0		0		0		1	1	1	1	1	1	4	1	4	4	3	4	1	0	0	0	0	0
54	2	73	155	1	50000	2	2	2	15	99	0	0	0	3	1	0		0		0		0		1	30	0		0		0		1	0	1	0	1	1	4	1	3	4	2	3	0	0	0	0	0	0
23	1	61	181	1	0	2	1	1	0	0	0	0	0	3	1	1	45	0		0		0		0		0		0		0		0	1	1	1	0	1	3	4	3	3	4	3	0	0	1	0	0	0
21	2	61	167	0	0	1	2	1	1	0	0	1	2	4	2	0		0		0		0		1	90	0		0		0		1	1	1	0	1	1	4	3	4	3	4	5	2	0	0	0	0	1
24	1	61	168	1	6000	2	1	1	0	0	1	2	0	4	2	1	60	0		0		0		1	75	0		0		0		0	0	1	0	1	1	4	3	4	4	5	5	0	0	0	0	0	1
27	1	71	170	1	18000	2	4	2	0	0	1	1	0	3	2	0		1	45	0		0		0		0		0		0		0	0	1	0	1	1	3	1	3	3	3	3	2	2	2	1	1	1
22	1	62	171	1	7000	2	1	1	0	0	2	1	0	3	2	1	30	0		0		0		0		1	120	0		0		0	1	1	1	1	1	4	3	4	3	3	4	1	1	1	0	0	0
22	2	57	165	1	0	2	1	1	99	99	0	0	0	3	1	0		0		0		0		1	50	0		0		0		1	1	1	1	1	1	4	3	4	3	4	4	1	0	0	0	0	1
23	1	112	171	1	15000	2	1	1	0	0	1	2	0	2	1	1	90	0		0		1	60	1	30	0		0		0		1	0	1	0	0	0	4	2	3	3	2	3	2	2	1	2	2	1
22	2	43	157	1	0	2	1	1	0	0	0	0	0	2	1	1	45	0		0		0		0		0		0		0		1	1	1	1	1	1	4	4	3	4	4	4	3	3	2	3	3	2
26	2	83	158	1	7000	3	1	1	1	0	0	1	0	2	1	0		0		1	45	0		1	60	0		0		0		0	0	1	1	0	0	4	2	5	3	3	3	1	2	1	1	0	1
34	1	67	163	3	20000	1	1	1	0	0	2	1	0	3	2	1	30	0		1	0	0		0		0		0		0		0	0	1	1	0	0	4	3	3	3	3	3	0	1	0	0	0	0
32	1	78	167	1	25000	2	3	2	0	0	0	1	0	3	2	1	120	0		0		0		0		0		0		1	60	1	0	1	1	0	1	3	1	3	3	4	3	2	2	2	1	1	1
49	1	72	172	1	50000	4	2	2	0	0	0	1	0	1	1	0		0		0		0		1	0	0		0		0		1	1	1	1	1	1	3	1	1	1	1	1	2	3	2	1	1	1
21	2	46	154	1	5000	2	1	1	0	0	0	1	0	1	2	1	60	0		0		0		1	30	0		0		0		0	0	1	0	0	1	4	2	4	3	2	4	0	0	0	0	0	0
22	1	62	172	1	10000	2	1	1	0	2	1	1	0	3	2	1	0	0		0		0		0		0		0		0		0	0	1	1	1	1	5	2	5	4	3	2	2	0	1	0	0	0
23	2	55	168	1	10000	1	1	1	0	0	1	2	0	2	1	0		0		0		0		1	30	0		0		0		1	0	0	1	0	1	3	1	3	2	2	2	1	1	1	0	0	1
22	1	80	168	1	8000	1	1	1	0	0	1	1	0	1	1	0		0		0		1	60	0		0		0		0		0	0	0	0	0	1	3	1	3	3	2	3	2	2	2	1	1	1
22	1	108	163	1	6000	1	1	1	0	0	0	0	0	3	1	1	30	0		0		0		1	60	0		0		0		0	1	1	1	1	1	4	3	4	4	4	4	2	3	3	3	2	3
23	1	64	170	1	0	2	1	1	0	0	0	1	0	1	2	1	60	0		0		0		0		0		0		0		0	0	1	0	0	1	3	2	4	3	2	3	0	0	0	0	0	0
42	2	55	160	1	12000	1	2	2	0	0	0	1	0	2	1	0		0		0		0		1	40	0		0		0		0	0	0	0	1	1	5	2	4	4	3	4	2	2	2	1	2	2
24	1	63	170	1	8000	2	1	1	0	0	1	1	0	3	2	0		0		0		0		0		1	85	0		0		1	0	1	0	1	1	4	1	3	3	4	3	1	1	0	0	0	1
39	2	90	178	1	25000	3	4	1	0	0	0	1	0	3	2	0		0		1	45	0		0		0		0		0		0	0	1	0	0	1	3	1	3	2	2	3	2	2	2	3	2	2
52	2	58	158	1	13000	1	3	1	0	0	0	1	0	2	1	0		0		0		0		1	45	0		0		0		0	0	0	1	1	1	3	1	3	3	2	2	3	3	3	2	2	2
20	2	47	165	1	12000	1	1	1	0	0	1	2	0	3	1	0		0		0		0		1	45	0		0		0		1	1	1	1	0	0	3	1	3	2	2	2	2	2	1	1	1	0
58	2	53	158	1	15000	2	2	2	16	0	0	0	0	5	2	0		0		0		0		1	40	0		0		0		1	0	1	1	1	1	4	1	4	3	3	3	0	3	2	0	0	0
48	2	53	168	1	20000	2	11	2	0	0	0	0	0	4	2	0		0		0		0		0		0		0		1	30	0	1	1	0	1	1	3	1	4	3	2	3	1	2	2	0	0	2
29	2	58	156	1	30000	2	3	1	17	0	0	0	0	2	1	1	10	0		0		0		1	20	0		0		0		0	0	1	0	1	0	3	1	3	3	2	3	0	0	0	0	0	0
34	1	74	175	2	60000	3	3	1	0	0	1	1	0	4	2	1	45	0		0		1	30	0		1	120	0		0		0	0	0	0	0	0	4	3	5	4	4	4	0	1	1	0	0	0
30	2	70	160	2	42000	2	3	2	0	0	2	1	0	5	2	1	30	0		1	45	0		0		1	60	0		0		0	1	1	1	0	0	3	2	4	3	3	2	0	0	0	0	0	0
45	2	46	160	2	50000	4	2	3	0	0	0	1	0	3	2	0		1	40	1	20	0		0		0		1	120	0		1	1	1	0	0	0	3	1	4	2	3	2	0	1	0	0	0	0
18	2	54	160	1	20000	2	1	1	0	0	0	1	0	2	1	1	30	0		0		0		0		0		0		0		0	0	0	0	1	1	3	1	3	4	2	3	0	0	0	0	0	0
18	2	48	158	1	10000	2	1	1	0	0	0	1	0	1	1	1	15	0		0		0		1	15	0		0		0		0	1	1	1	1	1	4	1	4	4	1	3	1	2	2	0	1	0
49	1	103	180	1	40000	2	2	2	0	0	2	1	0	3	2	0		0		0		0		0		0		1	120	0		0	0	0	0	1	0	3	1	1	1	3	3	0	1	0	0	0	0
41	1	90	178	2	30000	3	2	2	0	0	0	1	0	2	2	0		0		0		0		0		1	30	0		0		0	0	0	0	0	0	4	3	4	4	2	4	0	0	3	0	0	0
23	1	77	180	1	0	2	13	1	0	0	0	1	0	1	2	1	120	0		0		0		0		0		0		0		0	0	1	0	1	1	5	1	4	2	4	4	0	1	0	0	0	0
24	1	85	177	1	0	2	13	1	0	0	2	2	0	3	2	1	45	0		0		0		0		0		0		0		0	1	0	1	1	0	5	1	4	5	3	4	0	0	0	0	0	0
19	1	64	175	1	10000	2	1	1	1	0	2	3	0	3	1	0		0		0		0		0		0		0		0		0	0	0	0	0	0	5	2	5	5	2	5	0	1	1	1	1	1
53	1	110	180	1	0	1	4	1	11	0	2	3	0	4	2	1	0	0		0		0		1	0	0		0		0		1	0	1	0	1	0	4	2	5	4	4	4	0	3	2	0	0	0
49	2	59	163	2	0	3	4	1	0	0	0	0	0	5	2	1	0	0		0		0		1	0	0		0		0		1	0	1	0	0	0	2	1	4	4	3	2	0	0	0	0	0	0
23	2	49	158	1	15000	2	3	2	0	0	0	1	0	4	1	0		0		0		0		1	45	0		0		0		0	0	1	0	0	0	3	2	4	4	2	3	0	2	0	0	0	0
22	2	79	158	1	13000	2	3	1	0	0	0	0	0	3	1	0		0		0		0		0		0		0		1	30	1	0	1	1	1	1	3	2	4	3	2	2	0	0	0	0	0	0
25	2	45	150	1	13000	2	3	1	0	0	0	1	0	1	1	0		0		0		0		1	0	0		0		0		1	1	1	1	1	1	3	1	4	4	1	3	0	0	0	0	0	1
40	2	63	158	1	13000	1	3	3	0	0	2	1	0	1	1	0		1	0	0		0		1	0	0		0		0		1	0	1	0	0	0	4	1	4	4	2	2	2	2	2	1	1	1
20	1	67	170	1	0	2	1	1	9	1	0	1	0	1	1	0		0		0		0		1	30	0		0		0		0	0	0	1	0	0	4	2	4	2	2	2	0	0	0	0	0	0
22	1	76	168	1	0	1	1	1	0	0	0	0	0	3	2	1	60	0		1	120	0		1	60	0		0		0		1	1	1	1	1	1	4	4	4	4	4	4	2	2	2	2	2	3
60	2	71	148	1	0	2	11	2	0	0	0	0	0	4	2	0		1	40	1	30	1	30	1	30	0		0		0		1	1	1	1	1	1	5	4	3	4	1	3	2	2	2	1	2	2
25	1	66	170	1	0	2	1	1	0	0	0	3	0	1	1	0		0		1	60	0		1	0	0		0		0		1	1	1	1	1	1	3	3	3	4	3	3	0	0	0	0	0	0
23	2	55	150	1	6000	2	1	1	0	0	0	3	0	2	1	0		0		0		0		1	40	0		0		0		1	1	0	1	1	1	4	1	3	4	2	2	1	1	1	2	2	2
52	1	70		1	20000	2	1	4	19	0	0	3	0	1	1	0		0		0		0		0		0		0		0		1	1	1	0	1	0	3	3	3	3	1	2	1	0	1	1	1	1
25	1	55	156	1	6000	2	1	1	0	0	1	1	0	3	2	1	60	0		1	120	0		0		0		1	60	0		0	0	0	1	1	0	2	2	4	4	4	4	0	0	0	0	0	0
23	1	65	178	1	0	1	1	1	0	0	1	2	0	5	2	1	120	1	120	0		0		1	60	0		0		1	180	1	0	1	1	1	1	4	4	4	5	4	4	2	1	2	1	2	2
23	1	65	179	1	0	1	1	1	0	0	1	1	0	4	2	1	60	1	180	0		0		1	60	1	120	0		0		1	1	1	1	1	1	4	4	5	5	5	4	0	0	0	0	0	1
25	1	70	183	1	0	1	1	1	0	0	0	0	0	4	2	1	60	1	180	0		1	120	1	60	0		0		0		1	1	1	1	1	1	4	4	3	4	4	4	1	1	0	2	1	1
22	1	62	173	1	0	1	1	1	0	0	0	0	0	4	2	1	60	0		1	0	0		1	120	0		1	180	0		1	1	1	1	1	1	2	1	3	3	2	2	0	1	1	0	0	1
21	1	57	168	1	0	2	1	1	0	0	0	1	0	3	2	1	75	0		0		0		0		0		0		0		1	1	1	1	1	1	4	4	3	4	4	4	1	0	0	1	0	1
22	2	55	160	1	0	1	1	1	0	0	0	0	0	1	2	0		0		0		0		1	180	0		0		0		0	0	0	0	0	1	3	1	3	3	3	3	1	1	1	0	0	1
24	2	50	165	1	0	1	1	1	0	0	0	0	0	3	2	1	120	1	180	0		0		1	60	1	0	1	180	0		1	1	1	1	1	1	3	1	3	3	2	2	0	0	1	1	1	0
21	1	70		1	7000	2	1	1	1	99	0	0	0	2	2	1	60	0		0		0		0		0		0		0		0	0	1	0	1	0	4	1	3	3	2	4	1	1	0	1	2	1
21	1	55	173	1	9000	1	1	1	0	0	1	1	0	1	1	0		0		0		0		1	30	0		0		0		0	0	0	0	0	0	3	4	3	3	2	2	2	2	3	1	1	1
20	2	56	155	1	4500	1	1	1	0	0	0	1	0	1	1	1	0	0		0		0		1	0	0		0		0		0	0	0	0	0	0	3	2	4	5	1	4	0	3	0	0	0	0
21	2	56	157	1	4500	1	1	1	0	0	0	1	0	1	1	1	0	0		0		0		1	0	0		0		0		0	0	0	0	1	0	3	3	2	3	2	3	1	3	1	0	0	0
21	1	63	167	1	9000	1	1	1	0	0	0	1	0	3	2	1	30	0		0		0		0		0		0		1	40	0	0	1	0	1	0	4	1	5	4	2	3	1	0	0	0	0	0
27	2	43	158	1	0	2	3	1	0	0	0	3	0	2	2	1	30	1	40	0		0		1	50	0		0		0		0	0	1	0	1	0	4	3	2	3	3	4	0	0	0	0	0	0
26	2	58	158	1	1300	1	13	1	0	0	0	1	0	1	1	0		0		0		1	45	0		0		0		0		1	1	1	1	1	1	4	1	4	4	4	4	1	0	1	0	0	0
53	2	50	159	1	30000	2	4	2	20	4	0	0	0	4	2	0		0		0		0		0		0		0		1	0	0	0	1	0	1	0	4	2	4	2	4	4	3	3	2	2	3	2
26	2	63	165	1	13000	2	3	3	0	0	0	1	0	5	2	1	40	0		0		1	40	0		0		0		0		1	0	1	1	1	1	5	1	4	4	3	4	0	0	0	0	0	0
31	2	99	153	1	21000	2	3	1	0	99	0	1	0	4	2	0		0		0		0		0		0		0		1	60	0	0	1	1	1	0	5	2	5	4	4	4	2	2	0	0	1	0
22	1	74	174	1	0	2	1	1	0	0	1	1	0	6	2	1	50	0		1	90	1	90	1	12	0		0		0		1	1	1	1	1	1	1	2	1	2	1	1	1	1	1	0	0	0
22	1	63	169	2	0	1	1	1	0	0	0	0	0	6	2	1	30	0		0		1	110	0		0		0		0		0	1	0	0	0	1	4	1	4	4	3	4	0	0	3	1	1	2
22	1	64	164	1	6000	2	1	1	0	0	0	3	0	6	2	1	30	0		1	60	1	120	0		0		0		0		1	0	1	0	1	0	4	2	4	4	3	4	0	0	1	1	1	1
25	1	70	170	1	0	2	2	1	0	99	0	0	0	3	2	1	30	0		0		1	0	0		0		0		0		1	1	1	1	1	1	5	5	5	5	5	5	1	1	1	0	0	0
23	1	72	175	1	35000	2	3	1	0	0	0	3	0	5	2	0		0		0		1	0	1	0	0		0		1	0	1	1	1	1	1	0	3	1	4	3	2	4	0	0	0	0	0	0
27	1	60	167	1	12000	2	3	1	0	0	0	1	0	5	2	0		0		0		0		0		0		0		1	60	0	0	0	0	0	0	4	2	4	4	3	3	1	1	1	0	0	0
22	1	74	174	1	0	2	1	1	0	0	0	1	0	6	2	1	20	0		0		1	90	1	10	0		0		0		0	0	1	0	0	1	5	2	4	4	5	4	3	2	3	1	0	1
28	1	60.8	170	1	30000	2	4	1	0	0	0	1	0	4	2	0		0		0		1	0	0		0		0		0		0	0	1	0	0	0	3	1	4	3	4	2	0	0	0	0	1	0
60	2	59	162	1	0	2	11	4	15	0	0	0	0	6	2	0		0		0		0		0		0		0		1	0	0	0	1	1	1	0	4	4	4	4	2	4	0	0	0	0	0	0
42	1	75.5	178	1	20000	2	4	1	0	0	0	1	0	5	2	0		0		0		1	0	0		0		0		0		1	1	1	1	1	1	3	1	1	3	5	4	1	3	0	0	0	0
39	2	61	157	1	20000	2	4	1	0	0	0	1	0	4	2	0		0		0		1	0	0		0		0		0		0	0	1	0	1	0	4	4	4	4	2	2	0	2	0	0	0	0
48	2	54	155	1	0	2	4	2	0	0	0	1	0	2	2	0		1	0	0		0		0		0		0		1	60	0	1	1	0	1	1	4	3	4	3	4	4	0	0	0	0	0	0
32	2	54	167	1	60000	2	4	2	21	0	0	1	0	3	2	0		0		0		1	0	1	0	0		0		1	0	0	0	1	0	1	0	4	1	3	3	3	4	0	0	0	0	0	0
55	2	55	154	1	20000	1	13	1	0	0	0	0	0	1	1	0		0		0		0		1	30	0		0		0		0	0	1	1	1	0	4	3	3	3	4	3	2	2	2	2	2	1
60	1	60	162	1	150000	1	4	1	18	0	2	2	0	2	2	1	0	0		0		0		0		0		0		0		0	0	1	0	1	0	1	1	4	1	1	1	2	0	0	0	0	0
56	2	42	150	1	100000	1	4	2	12	0	0	0	0	3	2	0		0		1	0	0		0		0		0		1	0	1	1	0	1	0	0	1	1	1	1	1	1	2	2	0	0	0	1
60	2	55	157	1	15000	1	13	3	0	0	2	1	0	1	1	0		0		0		0		1	60	0		0		0		1	1	1	0	0	0	3	3	3	3	3	3	2	2	3	3	3	2
32	2	58	169	1	46000	2	3	2	0	0	0	0	0	1	2	1	30	1	60	0		0		0		0		0		0		1	1	1	0	1	1	4	2	4	4	4	4	1	1	1	2	2	0
30	2	64	158	1	10000	2	1	1	1	0	0	3	0	1	1	0		0		0		0		0		0		0		1	0	0	0	1	1	1	0	3	2	4	3	2	2	0	0	0	0	0	0
29	1	79	173	1	50000	3	2	1	0	0	0	1	0	1	1	0		0		0		1	60	0		0		1	60	0		1	0	0	0	1	1	3	3	4	3	3	4	0	1	0	0	0	0
25	1	65	166	1	0	2	3	1	0	0	0	1	0	6	2	1	30	0		0		1	60	0		0		0		0		0	0	1	1	1	0	5	1	4	4	1	1	0	0	0	0	0	0
														0		173
	173			11		15	0	0	2	3	36	27	16	67	107	213
					16									60	262	0
					344	147	244	325	312		312			109	17	0
					15	179	38	50	41		38			52
					11	0	39	8	2		36			65
						34	25	3						23
						14	2							10
							5							0
							6							0
							6
[truncated: 65 more columns]

## Sheet: Data code
Age	(year)
Sex	1=Male	2=Female
Weight	(kilogram)
Height	(centimetre)
Religion	0=Athiest	1=Budhist	2=Christian	3=Moslim
Income	(Thai baht)
Edu_level	1=below Bachelor degree	2=Bachelor degree	3=Master degree	4=Ph.D.
Occupation	1=Student	2=Government officer	3=Company officer	4=Business owners	5,…=Others
Marriage	1=Single	2=Married	3=Divorced	4=Widow
Hist_physical	0=No	1,…=Yes
Hist_Mental	0=No	1,…=Yes
Cigarrate	0=Never	1=Current	2=Former
Alcohol	0=Never	1=Current, not frequent	2=Current, frequent	3=Former
Substance	0=Never	1=Current	2=Former
Fq_exercise	(days in week)
Hours_exercise	1=less than one hour per day	2=1-3 hours per day	3=more than 3 hours
Type_Run	0=No	1=Yes
Time_Run	(Minutes)
Type_Swim	0=No	1=Yes
Time_Swim	(Minutes)
Type_Cycling	0=No	1=Yes
Time_Cycling	(Minutes)
Type_Wgt_train	0=No	1=Yes
Time_Wgt_train	(Minutes)
Type_walk	0=No	1=Yes
Time_walk	(Minutes)
Type_Bask	0=No	1=Yes
Time_Bask	(Minutes)
Type_Bat	0=No	1=Yes
Time_Bat	(Minutes)
Type_other	0=No	1=Yes
Time_other	(Minutes)
Diet	0=No	1=Yes
Calories	0=No	1=Yes
Food_gr	0=No	1=Yes
avoid_Sweet	0=No	1=Yes
DrinkWater	0=No	1=Yes
BurningCAl	0=No	1=Yes
EAI1	1=Totally disagreed	2=Disagreed	3=Not agreed or disagreed	4=Agreed	5=Totally agreed
EAI2	1=Totally disagreed	2=Disagreed	3=Not agreed or disagreed	4=Agreed	5=Totally agreed
EAI3	1=Totally disagreed	2=Disagreed	3=Not agreed or disagreed	4=Agreed	5=Totally agreed
EAI4	1=Totally disagreed	2=Disagreed	3=Not agreed or disagreed	4=Agreed	5=Totally agreed
EAI5	1=Totally disagreed	2=Disagreed	3=Not agreed or disagreed	4=Agreed	5=Totally agreed
EAI6	1=Totally disagreed	2=Disagreed	3=Not agreed or disagreed	4=Agreed	5=Totally agreed
KOOS_s1	0=None	1=Rarely	2=Sometimes	3=Frequently	4=Always
KOOS_s2	0=None	1=Rarely	2=Sometimes	3=Frequently	4=Always
KOOS_s3	0=None	1=Rarely	2=Sometimes	3=Frequently	4=Always
KOOS_s4	0=None	1=Rarely	2=Sometimes	3=Frequently	4=Always
KOOS_s5	0=None	1=Rarely	2=Sometimes	3=Frequently	4=Always
KOOS_s6	0=None	1=Rarely	2=Sometimes	3=Frequently	4=Always
KOOS_s7	0=None	1=Rarely	2=Sometimes	3=Frequently	4=Always
KOOS_p1	0=None	1=Rarely	2=Sometimes	3=Frequently	4=Always
KOOS_p2	0=None	1=Rarely	2=Sometimes	3=Frequently	4=Always
KOOS_p3	0=None	1=Rarely	2=Sometimes	3=Frequently	4=Always
KOOS_p4	0=None	1=Rarely	2=Sometimes	3=Frequently	4=Always
KOOS_p5	0=None	1=Rarely	2=Sometimes	3=Frequently	4=Always
KOOS_p6	0=None	1=Rarely	2=Sometimes	3=Frequently	4=Always
KOOS_p7	0=None	1=Rarely	2=Sometimes	3=Frequently	4=Always
KOOS_p8	0=None	1=Rarely	2=Sometimes	3=Frequently	4=Always
KOOS_p9	0=None	1=Rarely	2=Sometimes	3=Frequently	4=Always
KOOS_a1	0=None	1=Rarely	2=Sometimes	3=Frequently	4=Always
KOOS_a2	0=None	1=Rarely	2=Sometimes	3=Frequently	4=Always
KOOS_a3	0=None	1=Rarely	2=Sometimes	3=Frequently	4=Always
KOOS_a4	0=None	1=Rarely	2=Sometimes	3=Frequently	4=Always
KOOS_a5	0=None	1=Rarely	2=Sometimes	3=Frequently	4=Always
KOOS_a6	0=None	1=Rarely	2=Sometimes	3=Frequently	4=Always
KOOS_a7	0=None	1=Rarely	2=Sometimes	3=Frequently	4=Always
KOOS_a8	0=None	1=Rarely	2=Sometimes	3=Frequently	4=Always
KOOS_a9	0=None	1=Rarely	2=Sometimes	3=Frequently	4=Always
KOOS_a10	0=None	1=Rarely	2=Sometimes	3=Frequently	4=Always
KOOS_a11	0=None	1=Rarely	2=Sometimes	3=Frequently	4=Always
KOOS_a12	0=None	1=Rarely	2=Sometimes	3=Frequently	4=Always
KOOS_a13	0=None	1=Rarely	2=Sometimes	3=Frequently	4=Always
KOOS_a14	0=None	1=Rarely	2=Sometimes	3=Frequently	4=Always
KOOS_a15	0=None	1=Rarely	2=Sometimes	3=Frequently	4=Always
KOOS_a16	0=None	1=Rarely	2=Sometimes	3=Frequently	4=Always
KOOS_a17	0=None	1=Rarely	2=Sometimes	3=Frequently	4=Always
KOOS_sp1	0=None	1=Rarely	2=Sometimes	3=Frequently	4=Always
KOOS_sp2	0=None	1=Rarely	2=Sometimes	3=Frequently	4=Always
KOOS_sp3	0=None	1=Rarely	2=Sometimes	3=Frequently	4=Always
KOOS_sp4	0=None	1=Rarely	2=Sometimes	3=Frequently	4=Always
KOOS_sp5	0=None	1=Rarely	2=Sometimes	3=Frequently	4=Always
KOOS_q1	0=None	1=Rarely	2=Sometimes	3=Frequently	4=Always
KOOS_q2	0=None	1=Rarely	2=Sometimes	3=Frequently	4=Always
KOOS_q3	0=None	1=Rarely	2=Sometimes	3=Frequently	4=Always
KOOS_q4	0=None	1=Rarely	2=Sometimes	3=Frequently	4=Always
MH1	1=Totally disagreed	2=Disagreed	3=Not agreed or disagreed	4=Agreed	5=Totally agreed
MH2	1=Totally disagreed	2=Disagreed	3=Not agreed or disagreed	4=Agreed	5=Totally agreed
MH3	1=Totally disagreed	2=Disagreed	3=Not agreed or disagreed	4=Agreed	5=Totally agreed
MH4	1=Totally disagreed	2=Disagreed	3=Not agreed or disagreed	4=Agreed	5=Totally agreed
MH5	1=Totally disagreed	2=Disagreed	3=Not agreed or disagreed	4=Agreed	5=Totally agreed
MH6	1=Totally disagreed	2=Disagreed	3=Not agreed or disagreed	4=Agreed	5=Totally agreed
MH7	1=Totally disagreed	2=Disagreed	3=Not agreed or disagreed	4=Agreed	5=Totally agreed
MH8	1=Totally disagreed	2=Disagreed	3=Not agreed or disagreed	4=Agreed	5=Totally agreed
MH9	1=Totally disagreed	2=Disagreed	3=Not agreed or disagreed	4=Agreed	5=Totally agreed
MH10	1=Totally disagreed	2=Disagreed	3=Not agreed or disagreed	4=Agreed	5=Totally agreed
MH11	1=Totally disagreed	2=Disagreed	3=Not agreed or disagreed	4=Agreed	5=Totally agreed
MH12	1=Totally disagreed	2=Disagreed	3=Not agreed or disagreed	4=Agreed	5=Totally agreed
MH13	1=Totally disagreed	2=Disagreed	3=Not agreed or disagreed	4=Agreed	5=Totally agreed
MH14	1=Totally disagreed	2=Disagreed	3=Not agreed or disagreed	4=Agreed	5=Totally agreed
MH15	1=Totally disagreed	2=Disagreed	3=Not agreed or disagreed	4=Agreed	5=Totally agreed
MH16	1=Totally disagreed	2=Disagreed	3=Not agreed or disagreed	4=Agreed	5=Totally agreed
MH17	1=Totally disagreed	2=Disagreed	3=Not agreed or disagreed	4=Agreed	5=Totally agreed
MH18	1=Totally disagreed	2=Disagreed	3=Not agreed or disagreed	4=Agreed	5=Totally agreed
MH19	1=Totally disagreed	2=Disagreed	3=Not agreed or disagreed	4=Agreed	5=Totally agreed
MH20	1=Totally disagreed	2=Disagreed	3=Not agreed or disagreed	4=Agreed	5=Totally agreed
MH21	1=Totally disagreed	2=Disagreed	3=Not agreed or disagreed	4=Agreed	5=Totally agreed
BMI	kg/m2
EAI_Sum	(Score)
MH_Sum	(Score)
KOOS_Sum_Symptom	(Score)
KOOS_Sum_Pain	(Score)
KOOS_Sum_DailyAct	(Score)
KOOS_Sum_Moving	(Score)
KOOS_Sum_Qualityoflife	(Score)
